# Supplementary material for: The Impact of Atmospheric Cadmium Exposure on Colon Cancer and the Invasiveness of Intestinal Stents in the Cancerous Colon
Source: MDPI journal article supplement (doi:10.3390/toxics12030215), 2024-03-14
Supplement: s1 [file s1]

# Supplementary Material

## The Impact of Atmospheric Cadmium Exposure on Colon Cancer and the Invasiveness of Intestinal Stents in the Cancerous Colon

Shuai Zhang <sup>1</sup>, Ruikang Li <sup>2,\*</sup>, Jing Xu <sup>1,\*</sup>, Yan Liu <sup>2</sup> and Yanjie Zhang <sup>3</sup>

<sup>1</sup> Department of General Surgery, Tianjin Union Medical Center, No. 190 Jieyuan Road, Hongqiao District, Tianjin 300121, China; gelinbarlity@126.com

<sup>2</sup> Tianjin Key Laboratory of Urban Transport Emission Research & State Environmental Protection Key Laboratory of Urban Ambient Air Particulate Matter Pollution Prevention and Control, College of Environmental Science and Engineering, Nankai University, Tianjin 300071, China; liuyanwork@nankai.edu.cn

<sup>3</sup> Tianjin Youmei Environment Technology, Ltd., Tianjin 300300, China; yiyi5120@126.com

\* Correspondence: nklrkstudy@163.com (R.L.); xujingdoc@126.com (J.X.)

The supplementary material includes two figures.

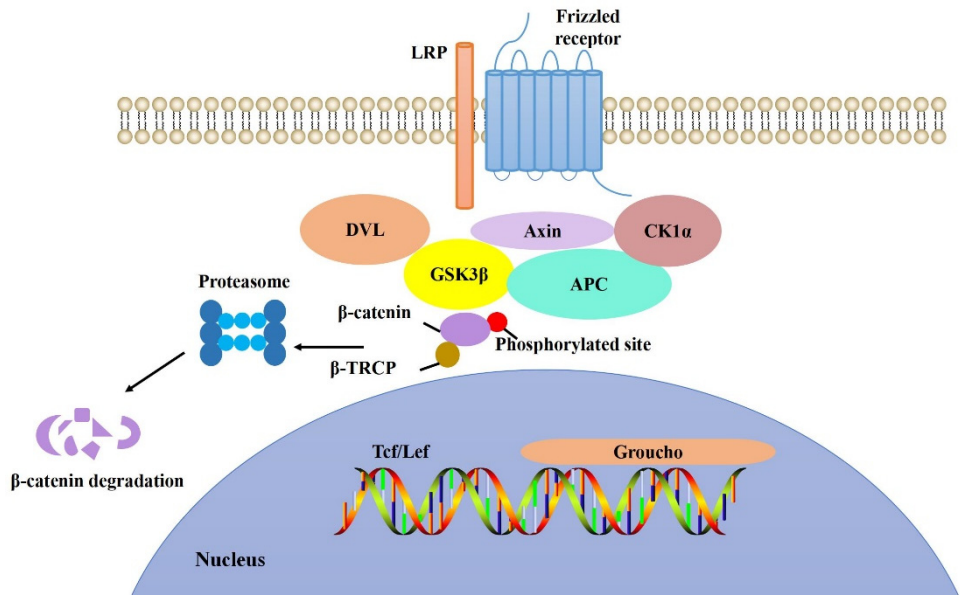

**Figure S1.** Basic conditions in healthy cells.

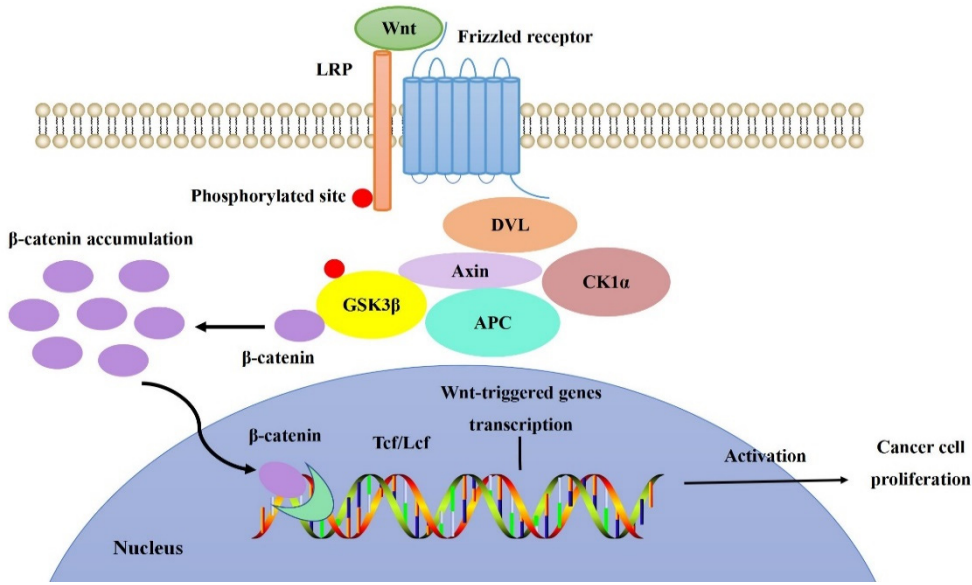

**Figure S2.** Cumulative mutations of  $\beta$ -catenin in cancer cells.
